# Supplementary material for: The Impact of Acute Low-Dose Gamma Irradiation on Biomass Accumulation and Secondary Metabolites Production in Cotinus coggygria Scop. and Fragaria × ananassa Duch. Red Callus Cultures
Source: MDPI journal article supplement (doi:10.3390/metabo13080894), 2023-07-28
Supplement: s1 [file s1]

**Table S1.** Pearson's correlation coefficient between analysed parameters: growth index (Gi), dry weight (DW), content of polyphenols (TPC), flavonoids (TFC), monomeric anthocyanins (MAC) and antioxidant activity (DPPH).

| Species            | Exp. variant | Gi-DW   | Gi-TPC        | Gi-TFC  | Gi-MAC  | Gi-DPPH       | DW-TPC             | DW-TFC        | DW-MAC  | DW-DPPH | TPC-TFC | TPC-MAC | TPC-DPPH | TFC-MAC       | TFC-DPPH | MAC-DPPH       |
|--------------------|--------------|---------|---------------|---------|---------|---------------|--------------------|---------------|---------|---------|---------|---------|----------|---------------|----------|----------------|
|                    |              | r value | r value       | r value | r value | r value       | r value            | r value       | r value | r value | r value | r value | r value  | r value       | r value  | r value        |
| <i>C. coggygia</i> | Control      | 0.373   | -0.861        | 0.161   | -0.966  | -0.423        | 0.148              | 0.975         | -0.598  | 0.682   | 0.361   | 0.703   | 0.824    | -0.408        | 0.825    | 0.177          |
|                    | 15 Gy        | 0.755   | -0.850        | 0.913   | -0.855  | -0.985        | -0.297             | 0.956         | -0.985  | -0.855  | -0.561  | 0.454   | 0.748    | -0.992        | -0.969   | 0.930          |
|                    | 20 Gy        | -0.970  | -0.474        | -0.949  | -0.722  | 0.834         | 0.671              | <b>0.997*</b> | 0.866   | -0.941  | 0.726   | 0.951   | -0.881   | 0.902         | -0.964   | -0.983         |
|                    | 25 Gy        | 0.224   | 0.224         | -0.069  | 0.923   | 0.797         | <b>0.999*</b>      | 0.958         | 0.580   | -0.409  | 0.951   | 0.597   | -0.389   | 0.323         | -0.652   | 0.505          |
|                    | 30 Gy        | -0.968  | 0.788         | 0.183   | 0.933   | <b>0.998*</b> | -0.916             | -0.420        | -0.815  | -0.979  | 0.748   | 0.515   | 0.815    | 0.181         | 0.227    | 0.916          |
|                    | 35 Gy        | -0.969  | 0.319         | 0.198   | -0.069  | 0.666         | -0.079             | 0.046         | 0.310   | -0.465  | 0.992   | 0.922   | 0.919    | 0.963         | 0.862    | 0.697          |
|                    | 40 Gy        | 0.871   | 0.333         | 0.877   | 0.968   | -0.631        | 0.753              | 0.530         | 0.965   | -0.169  | -0.158  | 0.556   | 0.520    | 0.732         | -0.925   | -0.420         |
| <i>F. ananassa</i> | Control      | 0.725   | 0.732         | -0.374  | 0.971   | -0.540        | <b>0.999*</b><br>* | 0.365         | 0.540   | -0.971  | 0.356   | 0.548   | -0.968   | -0.585        | -0.577   | -0.324         |
|                    | 15 Gy        | 0.959   | -0.544        | -0.853  | 0.739   | 0.746         | -0.758             | -0.965        | 0.520   | 0.529   | 0.901   | 0.161   | 0.151    | -0.281        | -0.291   | <b>0.999**</b> |
|                    | 20 Gy        | 0.858   | -0.255        | 0.177   | 0.950   | 0.334         | -0.715             | -0.352        | 0.655   | 0.770   | 0.906   | 0.059   | -0.996   | 0.457         | -0.867   | 0.024          |
|                    | 25 Gy        | -0.985  | <b>0.998*</b> | 0.910   | 0.534   | 0.996         | -0.993             | -0.966        | -0.385  | -0.968  | 0.929   | 0.491   | 0.991    | 0.136         | 0.873    | 0.601          |
|                    | 30 Gy        | -0.508  | -0.763        | -0.739  | 0.599   | 0.102         | 0.944              | -0.202        | 0.384   | -0.908  | 0.129   | 0.059   | -0.720   | -0.981        | 0.593    | -0.735         |
|                    | 35 Gy        | 0.859   | -0.034        | -0.558  | -0.502  | 0.555         | -0.540             | -0.903        | -0.873  | 0.053   | 0.848   | 0.881   | 0.811    | <b>0.997*</b> | 0.379    | 0.439          |
|                    | 40 Gy        | 0.769   | -0.785        | -0.668  | -0.496  | -0.847        | -0.209             | -0.039        | 0.171   | -0.313  | 0.985   | 0.927   | 0.994    | 0.977         | 0.961    | 0.881          |

\* $p < 0.05$ ; \*\* $p < 0.01$ ; \*\*\* $p < 0.001$ , according to Pearson's correlation coefficient.
